# Supplementary material
Source: publisher site journal article supplement (https://www.dovepress.com/get_supplementary_file.php?f=326563.docx)
Supplement: Supplementary file 1 [file get_supplementary_file.php]

**Annex**

**Table A.1** Loadings, Reliability and Validity

|  | Construct/indicator | Factor Loading | Composite reliability (CR) | rho_A | Cronbach´s alpha | Average Variance Extracted (AVE) |
| --- | --- | --- | --- | --- | --- | --- |
| POS | POS1 | 0,859 | 0,945 | 0,944 | 0,941 | 0,815 |
| POS2 | 0,928 |
| POS3 | 0,927 |
| POS4 | 0,880 |
| POS5 | 0,918 |
| **FBSBM** | FBSBM1 | 0,900 | 0,948 | 0,947 | 0,944 | 0,830 |
| FBSBM2 | 0,923 |
| FBSBM3 | 0,908 |
| FBSBM4 | 0,890 |
| FBSBM5 | 0,935 |
| **FBSBI** | FBSBI1 | 0,924 | 0,952 | 0,951 | 0,949 | 0,829 |
| FBSBI2 | 0,876 |
| FBSBI3 | 0,902 |
| FBSBI4 | 0,922 |
| FBSBI5 | 0,914 |
| FBSBI6 | 0,926 |
| WE | WE1 | 0,946 | 0,940 | 0,939 | 0,936 | 0,793 |
| WE2 | 0,817 |
| WE3 | 0,925 |
| WE4 | 0,941 |
| WE5 | 0,894 |
| WE6 | 0,840 |
| WE7 | 0,932 |
| WE8 | 0,859 |
| WE9 | 0,853 |

**Table A.2** Discriminant validity (Fornell-Lacker criteria)/HTMT Ratio

|  | FBSBI | FBSBM | POS | WE |
| --- | --- | --- | --- | --- |
| FBSBI | ***0.896/-*** |  |  |  |
| FBSBM | 0.682/0.643 | ***0.939/-*** |  |  |
| POS | 0.892/0.952 | 0.906/0.934 | ***0.895/-*** |  |
| WE | 0.895/0.934 | 0.888/0.919 | 0.858/0.897 | ***0.869/-*** |

*Notes: Diagonal elements (values in Bold Italic) are the square root of variance shared between the constructs and their measures (AVE). Off-diagonal elements are the correlations among constructs. For discriminant validity, the diagonal elements should be larger than the off-diagonal elements. HTMT Ratio results are behind the slash.*

**Table A.3** PLS-SEM/multigroup analysis for managers by gender and specialization

|  | Path Coeff. Orig.  (male - female) | p-Value | Path Coeff. Orig. (specialization yes - no) | p-Value |
| --- | --- | --- | --- | --- |
| FBSBI -> WE | -0.224 | 0.384 | 0.666* | 0.001 |
| FBSBM -> WE | 0.098 | 0.709 | 0.343 | 0.083 |
| POS -> FBSBI | -0.084* | 0.000 | -0.058 | 0.270 |
| POS -> FBSBM | -0.100 | 0.620 | -0.128* | 0.004 |
| POS -> WE | 0.149 | 0.357 | 0.464* | 0.000 |
|  |  |  |  |  |

**Table A.4** PLS-SEM/multigroup analysis for managers by tenure

|  | Path Coefficients Original (low tenure – less than 5 years) | Path Coefficients Original (middle tenure – between 5,1 – 15 years) | Path Coefficients Original (high – more than 15 years) | p-Value (specialization no) |
| --- | --- | --- | --- | --- |
| FBSBI -> WE | 0.399 | 0.390 | 0,397 | 0.726 |
| FBSBM -> WE | 0.820 | 0.550 | 0,450 | 0.345 |
| POS -> FBSBI | 0.980 | 0.950 | 0,900 | 0.000* |
| POS -> FBSBM | 0.902 | 0.542 | 0.410 | 0.068 |
| POS -> WE | 0,659 | 0.647 | 0.638 | 0.048* |
| FBSBI -> WE | 0.928 | 0.870 | 0.822 | 0.020* |
|  |  |  |  |  |
